# Supplementary material for: Analysis of the geographic pattern of the police reports for domestic violence in Girona (Spain)
Source: Springer Nature journal article supplement (doi:10.1186/s12889-022-12916-4), 2022-03-21
Supplement: MOESM1 [file 20239252]

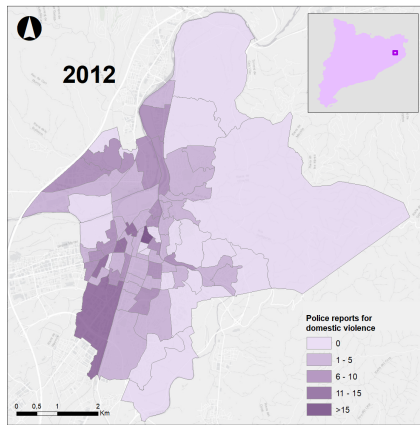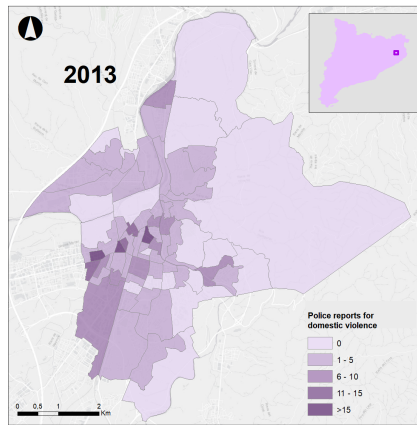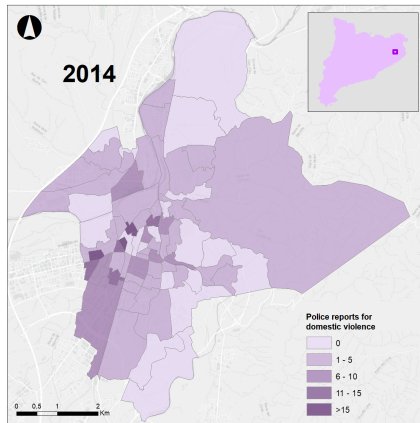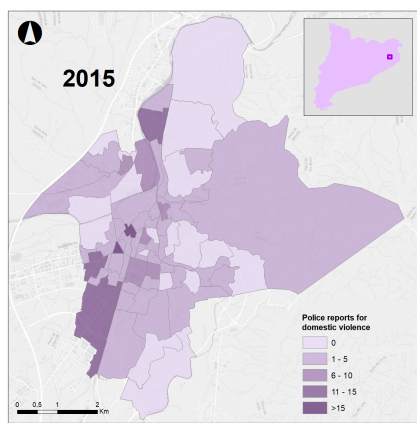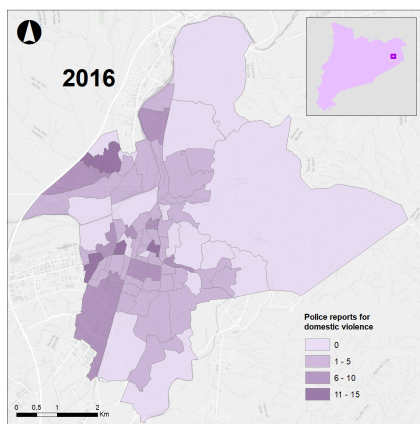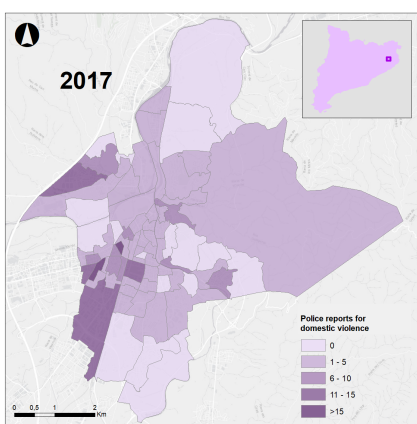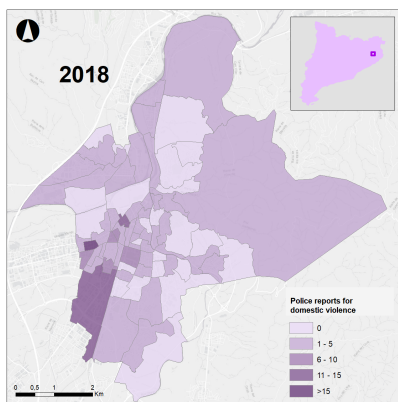

**Supplementary Figure 1.** Police reports of domestic violence in the census tracts of Girona per year (2012-2018)
